# Supplementary material for: Mutational background influences P. aeruginosa ciprofloxacin resistance evolution but preserves collateral sensitivity robustness
Source: PubMed Central journal article supplement — Proc Natl Acad Sci U S A. 2022 Apr 6;119(15):e2109370119. doi: 10.1073/pnas.2109370119 (PMC9169633; doi:10.1073/pnas.2109370119), 2022-04-06
Supplement: pnas.2109370119.sapp.pdf [file pnas.2109370119.sapp.pdf]

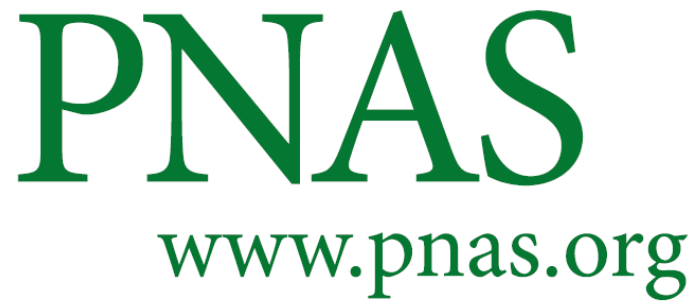

**Supplementary Information for  
Mutational background influences *P. aeruginosa* ciprofloxacin  
resistance evolution but preserves collateral sensitivity  
robustness**

Sara Hernando-Amado, Pablo Laborda, José R. Valverde, José Luis Martínez

José Luis Martínez  
Email: [jlmtnez@cnb.csic.es](mailto:jlmtnez@cnb.csic.es)

Sara Hernando-Amado  
Email: [shernando@cnb.csic.es](mailto:shernando@cnb.csic.es)

**This PDF file includes:**

Tables S1 to S6

**Table S1. MIC values ( $\mu\text{g/mL}$ ) of antibiotics belonging to different structural families in the final populations of *P. aeruginosa* after ALE on tobramycin.**

|                    |                  | <b>TOB</b> | <b>CAZ</b> | <b>CIP</b> | <b>ATM</b> | <b>FOF</b> | <b>IPM</b> |
|--------------------|------------------|------------|------------|------------|------------|------------|------------|
| <b>Parental</b>    | PA14             | 1          | 1          | 0.064      | 2          | 64         | 0.75       |
|                    | <i>parR87</i>    | 1.5        | 1          | 0.125      | 3          | 48         | 1          |
|                    | <i>orfN50</i>    | 3          | 3          | 0.19       | 6          | 16         | 1          |
|                    | <i>nfxB177</i>   | 1          | 1          | 2          | 2          | 48         | 0.75       |
|                    | <i>mexZ43</i>    | 1          | 1.5        | 0.125      | 2          | 96         | 1          |
|                    | MDR6             | 1.5        | 1.5        | 0.125      | 1          | 32         | 0.5        |
|                    | MDR12            | 32         | 1          | 0.38       | 3          | 96         | 0.5        |
| <b>TOB<br/>ALE</b> | PA14 1           | 4          | 3          | 0.064      | 3          | 32         | 0.75       |
|                    | PA14 2           | 4          | 3          | 0.094      | 6          | 32         | 0.75       |
|                    | PA14 3           | 3          | 1          | 0.064      | 3          | 32         | 0.75       |
|                    | PA14 4           | 3          | 3          | 0.064      | 6          | 48         | 0.75       |
|                    | <i>parR87</i> 1  | 24         | 2          | 0.38       | 3          | 24         | 1.5        |
|                    | <i>parR87</i> 2  | 8          | 1.5        | 0.19       | 3          | 32         | 1.5        |
|                    | <i>parR87</i> 3  | 16         | 4          | 0.38       | 3          | 64         | 1          |
|                    | <i>parR87</i> 4  | 3          | 1.5        | 0.19       | 3          | 48         | 2          |
|                    | <i>orfN50</i> 1  | 12         | 2          | 0.25       | 4          | 8          | 1          |
|                    | <i>orfN50</i> 2  | 8          | 2          | 0.19       | 4          | 8          | 1          |
|                    | <i>orfN50</i> 3  | 6          | 3          | 0.25       | 3          | 8          | 1          |
|                    | <i>orfN50</i> 4  | 24         | 3          | 0.25       | 4          | 8          | 1          |
|                    | <i>nfxB177</i> 1 | 8          | 3          | 0.19       | 4          | 16         | 0.75       |
|                    | <i>nfxB177</i> 2 | 2          | 2          | 2          | 3          | 32         | 0.75       |
|                    | <i>nfxB177</i> 3 | 3          | 4          | 0.125      | 4          | 32         | 1          |
|                    | <i>nfxB177</i> 4 | 2          | 1          | 1.5        | 0.5        | 24         | 0.75       |
|                    | <i>mexZ43</i> 1  | 12         | 2          | 0.25       | 4          | 32         | 1.5        |
|                    | <i>mexZ43</i> 2  | 12         | 2          | 0.38       | 6          | 24         | 2          |
|                    | <i>mexZ43</i> 3  | 12         | 3          | 0.5        | 4          | 16         | 1.5        |
|                    | <i>mexZ43</i> 4  | 12         | 3          | 0.38       | 6          | 24         | 1          |
| MDR6 1             | 6                | 0.5        | 0.125      | 1          | 32         | 0.38       |            |

|         |    |     |      |     |    |      |
|---------|----|-----|------|-----|----|------|
| MDR6 2  | 8  | 0.5 | 0.25 | 1.5 | 32 | 0.38 |
| MDR6 3  | 6  | 1.5 | 0.25 | 3   | 12 | 0.5  |
| MDR6 4  | 8  | 2   | 0.19 | 6   | 24 | 0.5  |
| MDR12 1 | 96 | 1.5 | 0.5  | 4   | 32 | 0.75 |
| MDR12 2 | 64 | 2   | 0.5  | 2   | 16 | 0.75 |
| MDR12 3 | 64 | 1.5 | 0.5  | 3   | 64 | 0.75 |
| MDR12 4 | 96 | 1.5 | 0.5  | 2   | 32 | 0.75 |

---

TOB: tobramycin, CAZ: ceftazidime, CIP: ciprofloxacin, ATM: aztreonam, FOF: fosfomicin, IPM: imipenem.

**Table S2. MIC values ( $\mu\text{g/mL}$ ) of antibiotics belonging to different structural families in the final populations of *P. aeruginosa* after ALE on aztreonam.**

|                  |                    | TOB    | CAZ | CIP   | ATM  | FOF | IPM  |
|------------------|--------------------|--------|-----|-------|------|-----|------|
| <b>Parental</b>  | PA14               | 1      | 1   | 0.064 | 2    | 64  | 0.75 |
|                  | <i>parR87</i>      | 1.5    | 1   | 0.125 | 3    | 48  | 1    |
|                  | <i>orfN50</i>      | 3      | 3   | 0.19  | 6    | 16  | 1    |
|                  | <i>nfxB177</i>     | 1      | 1   | 2     | 2    | 48  | 0.75 |
|                  | <i>mexZ43</i>      | 1      | 1.5 | 0.125 | 2    | 96  | 1    |
|                  | MDR6               | 1.5    | 1.5 | 0.125 | 1    | 32  | 0.5  |
|                  | MDR12              | 32     | 1   | 0.38  | 3    | 96  | 0.5  |
|                  | <b>ATM<br/>ALE</b> | PA14 1 | 1   | 4     | 0.19 | 12  | 64   |
| PA14 2           |                    | 1      | 3   | 0.25  | 16   | 64  | 0.5  |
| PA14 3           |                    | 2      | 4   | 0.19  | 16   | 64  | 0.38 |
| PA14 4           |                    | 1      | 3   | 0.25  | 12   | 64  | 0.75 |
| <i>parR87</i> 1  |                    | 1.5    | 3   | 0.5   | 8    | 96  | 0.5  |
| <i>parR87</i> 2  |                    | 2      | 3   | 0.5   | 8    | 96  | 0.75 |
| <i>parR87</i> 3  |                    | 2      | 3   | 0.5   | 6    | 128 | 1.5  |
| <i>parR87</i> 4  |                    | 1      | 4   | 0.75  | 8    | 64  | 1    |
| <i>orfN50</i> 1  |                    | 3      | 8   | 0.094 | 16   | 8   | 0.75 |
| <i>orfN50</i> 2  |                    | 2      | 6   | 0.094 | 16   | 96  | 0.5  |
| <i>orfN50</i> 3  |                    | 3      | 6   | 0.094 | 12   | 12  | 0.5  |
| <i>orfN50</i> 4  |                    | 1      | 8   | 0.38  | 24   | 96  | 1    |
| <i>nfxB177</i> 1 |                    | 1      | 8   | 0.25  | 48   | 64  | 0.5  |
| <i>nfxB177</i> 2 |                    | 1.5    | 4   | 0.38  | 8    | 64  | 0.38 |
| <i>nfxB177</i> 3 |                    | 1      | 6   | 0.5   | 8    | 64  | 0.5  |
| <i>nfxB177</i> 4 |                    | 1.5    | 6   | 0.5   | 12   | 96  | 1    |
| <i>mexZ43</i> 1  |                    | 3      | 2   | 0.5   | 8    | 96  | 0.5  |
| <i>mexZ43</i> 2  |                    | 3      | 3   | 0.19  | 12   | 32  | 3    |
| <i>mexZ43</i> 3  |                    | 4      | 8   | 0.19  | 24   | 16  | 0.5  |
| <i>mexZ43</i> 4  |                    | 1.5    | 3   | 0.5   | 12   | 96  | 0.5  |
| MDR6 1           |                    | 1      | 4   | 0.125 | 8    | 4   | 0.5  |

|         |      |   |       |    |       |       |
|---------|------|---|-------|----|-------|-------|
| MDR6 2  | 1    | 3 | 0.094 | 6  | 6     | 0.125 |
| MDR6 3  | 1    | 4 | 0.125 | 12 | 12    | 0.5   |
| MDR6 4  | 0.75 | 6 | 0.094 | 12 | 12    | 0.5   |
| MDR12 1 | 32   | 2 | 0.5   | 12 | >1024 | 0.75  |
| MDR12 2 | 32   | 3 | 0.5   | 12 | 384   | 0.75  |
| MDR12 3 | 32   | 3 | 0.5   | 8  | 256   | 0.75  |
| MDR12 4 | 16   | 4 | 0.5   | 8  | 256   | 0.75  |

---

TOB: tobramycin, CAZ: ceftazidime, CIP: ciprofloxacin, ATM: aztreonam, FOF: fosfomicin, IPM: imipenem.

**Table S3. MIC values ( $\mu\text{g/mL}$ ) of antibiotics belonging to different structural families in the final populations of *P. aeruginosa* after ALE on ciprofloxacin.**

|                  |                    | TOB    | CAZ  | CIP   | ATM | FOF | IPM   |
|------------------|--------------------|--------|------|-------|-----|-----|-------|
| <b>Parental</b>  | PA14               | 1      | 1    | 0.064 | 2   | 64  | 0.75  |
|                  | <i>parR87</i>      | 1.5    | 1    | 0.125 | 3   | 48  | 1     |
|                  | <i>orfN50</i>      | 3      | 3    | 0.19  | 6   | 16  | 1     |
|                  | <i>nfxB177</i>     | 1      | 1    | 2     | 2   | 48  | 0.75  |
|                  | <i>mexZ43</i>      | 1      | 1.5  | 0.125 | 2   | 96  | 1     |
|                  | MDR6               | 1.5    | 1.5  | 0.125 | 1   | 32  | 0.5   |
|                  | MDR12              | 32     | 1    | 0.38  | 3   | 96  | 0.5   |
|                  | <b>CIP<br/>ALE</b> | PA14 1 | 0.75 | 1     | 1   | 2   | 64    |
| PA14 2           |                    | 0.38   | 1.5  | 1.5   | 1.5 | 64  | 0.75  |
| PA14 3           |                    | 0.38   | 1.5  | 1.5   | 1.5 | 48  | 0.75  |
| PA14 4           |                    | 0.5    | 1.5  | 3     | 1   | 64  | 0.75  |
| <i>parR87</i> 1  |                    | 1      | 2    | 3     | 1.5 | 64  | 0.5   |
| <i>parR87</i> 2  |                    | 0.75   | 1.5  | 2     | 1.5 | 48  | 0.75  |
| <i>parR87</i> 3  |                    | 0.5    | 1.5  | 4     | 1.5 | 64  | 0.75  |
| <i>parR87</i> 4  |                    | 0.75   | 1    | 16    | 1   | 48  | 0.75  |
| <i>orfN50</i> 1  |                    | 0.75   | 1.5  | 1.5   | 1   | 8   | 0.5   |
| <i>orfN50</i> 2  |                    | 0.5    | 2    | 1.5   | 1.5 | 12  | 0.5   |
| <i>orfN50</i> 3  |                    | 0.75   | 1.5  | 2     | 1.5 | 16  | 0.38  |
| <i>orfN50</i> 4  |                    | 1      | 1.5  | 3     | 1.5 | 16  | 0.75  |
| <i>nfxB177</i> 1 |                    | 0.5    | 0.75 | 24    | 1   | 64  | 0.125 |
| <i>nfxB177</i> 2 |                    | 0.5    | 0.5  | 16    | 1   | 64  | 0.094 |
| <i>nfxB177</i> 3 |                    | 0.5    | 0.75 | >32   | 1   | 48  | 0.19  |
| <i>nfxB177</i> 4 |                    | 0.5    | 0.38 | 8     | 1   | 32  | 0.19  |
| <i>mexZ43</i> 1  |                    | 0.5    | 1.5  | 1.5   | 1.5 | 48  | 0.75  |
| <i>mexZ43</i> 2  |                    | 1.5    | 1.5  | 6     | 1.5 | 32  | 1     |
| <i>mexZ43</i> 3  |                    | 1      | 0.75 | 6     | 4   | 24  | 0.75  |
| <i>mexZ43</i> 4  |                    | 0.75   | 1    | 2     | 1.5 | 48  | 0.5   |
| MDR6 1           |                    | 0.5    | 1    | 3     | 0.5 | 24  | 0.38  |

|         |     |     |     |      |    |      |
|---------|-----|-----|-----|------|----|------|
| MDR6 2  | 0.5 | 0.5 | 2   | 0.5  | 24 | 0.38 |
| MDR6 3  | 0.5 | 0.5 | 1.5 | 0.5  | 24 | 0.38 |
| MDR6 4  | 0.5 | 0.5 | 2   | 0.75 | 24 | 0.38 |
| MDR12 1 | 16  | 1.5 | 1.5 | 1    | 32 | 0.38 |
| MDR12 2 | 24  | 1.5 | 4   | 3    | 64 | 0.5  |
| MDR12 3 | 24  | 2   | 3   | 1.5  | 48 | 0.38 |
| MDR12 4 | 16  | 1.5 | 2   | 1.5  | 64 | 0.5  |

---

TOB: tobramycin, CAZ: ceftazidime, CIP: ciprofloxacin, ATM: aztreonam, FOF: fosfomicin, IPM: imipenem.

**Table S4. MIC values ( $\mu\text{g/mL}$ ) of antibiotics belonging to different structural families in the final control populations of *P. aeruginosa* after ALE with no antibiotic.**

|                        |                  | TOB  | CAZ   | CIP   | ATM | FOF  | IPM  |
|------------------------|------------------|------|-------|-------|-----|------|------|
| <b>Parental</b>        | PA14             | 1    | 1     | 0.064 | 2   | 64   | 0.75 |
|                        | <i>parR87</i>    | 1.5  | 1     | 0.125 | 3   | 48   | 1    |
|                        | <i>orfN50</i>    | 3    | 3     | 0.19  | 6   | 16   | 1    |
|                        | <i>nfxB177</i>   | 1    | 1     | 2     | 2   | 48   | 0.75 |
|                        | <i>mexZ43</i>    | 1    | 1.5   | 0.125 | 2   | 96   | 1    |
|                        | MDR6             | 1.5  | 1.5   | 0.125 | 1   | 32   | 0.5  |
|                        | MDR12            | 32   | 1     | 0.38  | 3   | 96   | 0.5  |
| <b>Control<br/>ALE</b> | PA14 1           | 1    | 1     | 0.064 | 2   | 64   | 0.75 |
|                        | PA14 2           | 1    | 1     | 0.064 | 2   | 64   | 0.75 |
|                        | PA14 3           | 1    | 1     | 0.064 | 2   | 64   | 1    |
|                        | PA14 4           | 1    | 1     | 0.064 | 3   | 48   | 1    |
|                        | <i>parR87</i> 1  | 1.5  | 1     | 0.19  | 2   | 48   | 1    |
|                        | <i>parR87</i> 2  | 1.5  | 1     | 0.125 | 2   | 48   | 1    |
|                        | <i>parR87</i> 3  | 1.5  | 1     | 0.125 | 2   | 48   | 1.5  |
|                        | <i>parR87</i> 4  | 1.5  | 1     | 0.19  | 2   | 48   | 1    |
|                        | <i>orfN50</i> 1  | 2    | 3     | 0.125 | 6   | 16   | 0.75 |
|                        | <i>orfN50</i> 2  | 2    | 2     | 0.125 | 6   | 16   | 0.75 |
|                        | <i>orfN50</i> 3  | 2    | 3     | 0.125 | 6   | 12   | 0.75 |
|                        | <i>orfN50</i> 4  | 3    | 2     | 0.125 | 6   | 16   | 0.75 |
|                        | <i>nfxB177</i> 1 | 0.75 | 1     | 2     | 2   | 48   | 0.75 |
|                        | <i>nfxB177</i> 2 | 0.75 | 1     | 2     | 2   | 48   | 0.75 |
|                        | <i>nfxB177</i> 3 | 0.75 | 1     | 2     | 2   | 48   | 0.75 |
|                        | <i>nfxB177</i> 4 | 1    | 1     | 2     | 2   | 48   | 0.5  |
|                        | <i>mexZ43</i> 1  | 1    | 1     | 0.19  | 2   | 96   | 0.75 |
|                        | <i>mexZ43</i> 2  | 0.75 | 1     | 0.125 | 2   | 64   | 1    |
|                        | <i>mexZ43</i> 3  | 1    | 1     | 0.19  | 1.5 | 64   | 0.75 |
|                        | <i>mexZ43</i> 4  | 1    | 1     | 0.125 | 2   | 64   | 0.75 |
| MDR6 1                 | 1.5              | 1    | 0.125 | 0.75  | 32  | 0.38 |      |



|         |     |   |       |     |    |      |
|---------|-----|---|-------|-----|----|------|
| MDR6 2  | 1.5 | 1 | 0.125 | 1   | 24 | 0.38 |
| MDR6 3  | 1.5 | 1 | 0.125 | 1.5 | 32 | 0.5  |
| MDR6 4  | 1.5 | 1 | 0.125 | 1   | 32 | 0.38 |
| MDR12 1 | 32  | 1 | 0.38  | 2   | 96 | 0.5  |
| MDR12 2 | 32  | 1 | 0.38  | 2   | 64 | 0.5  |
| MDR12 3 | 32  | 1 | 0.38  | 2   | 64 | 0.75 |
| MDR12 4 | 32  | 1 | 0.38  | 2   | 96 | 0.5  |

---

TOB: tobramycin, CAZ: ceftazidime, CIP: ciprofloxacin, ATM: aztreonam, FOF: fosfomycin, IPM: imipenem.

**Table S5. FIC index of Ciprofloxacin-Tobramycin and Ciprofloxacin-Aztreonam combinations for parental strains used within this work.**

|                | FIC index <sub>CIP-TOB</sub> | FIC index <sub>CIP-ATM</sub> |
|----------------|------------------------------|------------------------------|
| PA14           | 0.75                         | 0.75                         |
| <i>parR87</i>  | 0.63                         | 0.57                         |
| <i>orfN50</i>  | 0.75                         | 1                            |
| <i>nfxB177</i> | 1.5                          | 0.75                         |
| <i>mexZ43</i>  | 0.5                          | 0.75                         |
| MDR6           | 0.75                         | 1                            |
| MDR12          | 1                            | 0.75                         |

TOB: tobramycin, CIP: ciprofloxacin, ATM: aztreonam.

**Table S6. Primers used in this study**

| <b>Primer</b>  | <b>Sequence (5'-3')</b>        | <b>Description</b>      |
|----------------|--------------------------------|-------------------------|
| <i>gyrA.fw</i> | AGTCCTATCTCGACTACGCGAT         | To amplify              |
| <i>gyrA.rv</i> | AGTCGACGGTTTCCTTTTCCAG         | QRDR* of<br><i>gyrA</i> |
| <i>gyrB.fw</i> | CGCGGTGGAACAGGAGATGGGCAAGTAC   | To amplify              |
| <i>gyrB.rv</i> | CTGGCGGAAGAAGAAGGTCAACAGCAGGGT | QRDR of <i>gyrB</i>     |
| <i>nfxB.fw</i> | AAACCAACCGGGACCCATCG           | To amplify              |
| <i>nfxB.rv</i> | GTGCCATGCGGCGACGAGAG           | <i>nfxB</i>             |
| <i>mexS.fw</i> | TGAGGTTATTCACCCCGTGA           | To amplify              |
| <i>mexS.rv</i> | TTCGCTGCGGGTCGTCCTCAAT         | <i>mexS</i>             |

\*QRDR: Quinolone Resistance Determining Region.
